# Supplementary material for: Dietary Fat-Accelerating Leptin Signaling Promotes Protumorigenic Gastric Environment in Mice
Source: PubMed Central journal article supplement (PMC6770546; doi:10.3390/nu11092127), 2019-09-06
Supplement: nutrients-11-02127-s001.pdf [file nutrients-11-02127-s001.pdf]

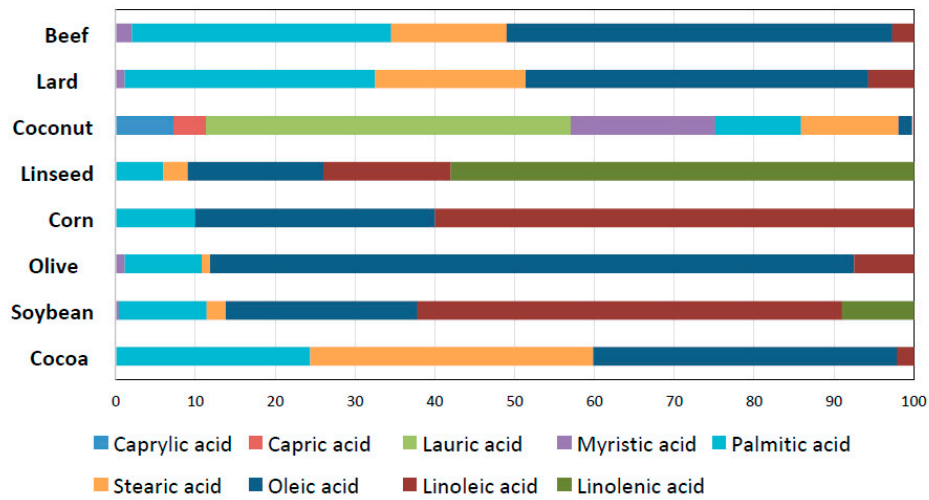

**Figure S1.** Fatty acid composition of beef tallow (Beef), Lard, hydrogenated coconut oil (Coconut), linseed oil (Linseed), corn oil (Corn), olive oil (Olive), soybean oil (Soybean), and cocoa butter (Cocoa).

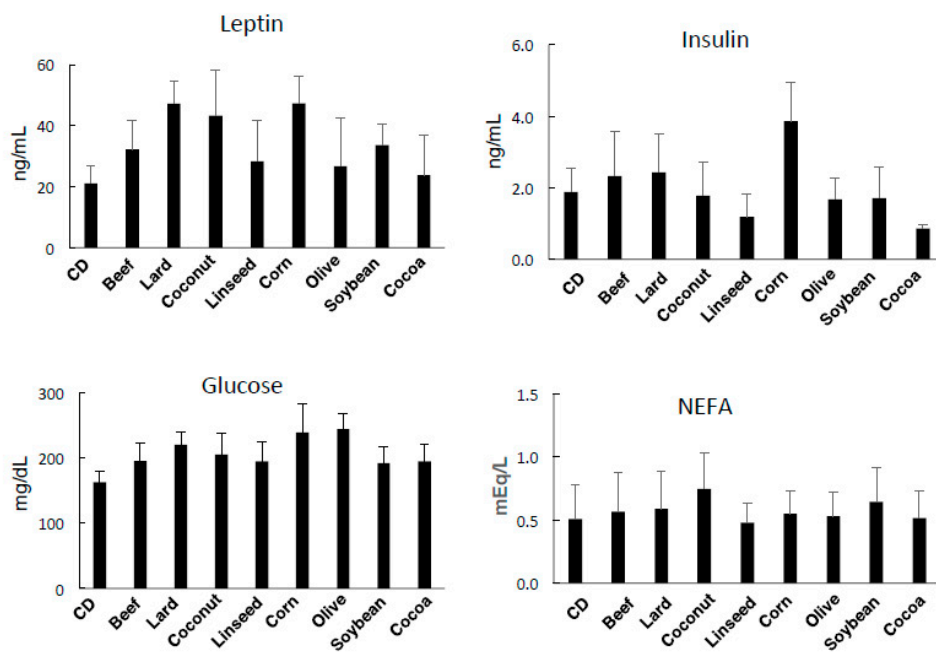

**Figure S2.** Alteration of index associated with obesity. Serum leptin, insulin, glucose, and NEFA in mice fed experimental diets for 12 weeks. Data, shown as mean ± SD were analyzed by the one-way ANOVA followed by Holm-Sidak post-hoc test for multiple comparisons.

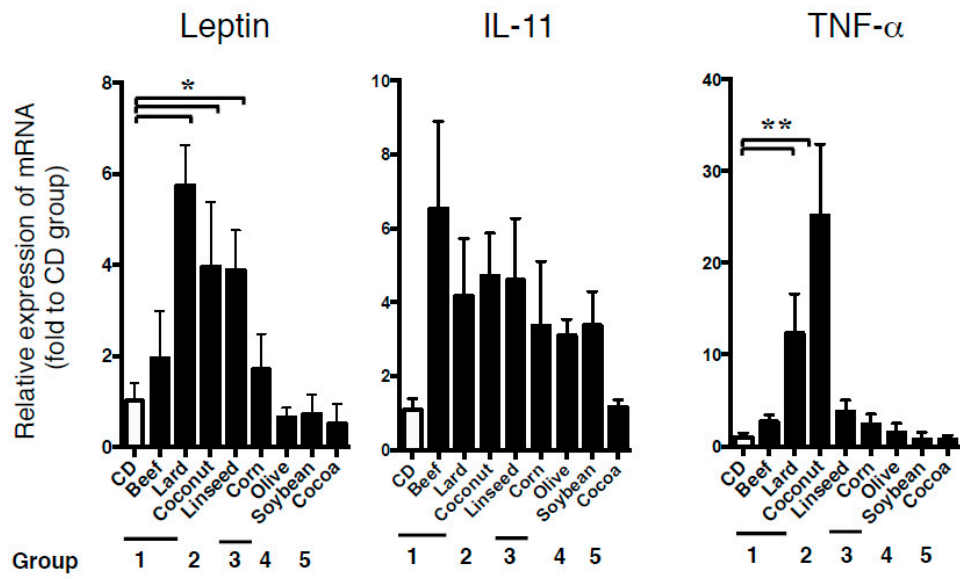

**Figure S3.** Augmented mRNA expression of leptin in Lard and Linseed-type diets. Data, shown as mean  $\pm$  SD of 8 mice were analyzed by the one-way ANOVA followed by Holm-Sidak post-hoc test for multiple comparisons. \*  $p < 0.05$ , \*\*  $p < 0.001$ .

Table S1 Diet composition.

| Ingredient (g/100g)                                                   | CD     | HFDs   |
|-----------------------------------------------------------------------|--------|--------|
| Casein                                                                | 14.00  | 14.00  |
| L-Cystine                                                             | 0.18   | 0.18   |
| a-Corn starch                                                         | 54.97  | 22.97  |
| Maltodextrin                                                          | 9.00   | 9.00   |
| Sucrose                                                               | 8.10   | 8.10   |
| Soybean oil                                                           | 4.00   | 4.00   |
| Cellulose                                                             | 5.00   | 5.00   |
| AIN-93M mineral mix                                                   | 3.50   | 3.50   |
| AIN-93 vitamin mix                                                    | 1.00   | 1.00   |
| Choline bitartrate                                                    | 0.25   | 0.25   |
| tert-Butylhydroquinone                                                | 0.0008 | 0.0008 |
| Fats (Lard, Beef,<br>Coconut, Linseed, Corn,<br>Olive, Soybean, Cocoa | 0.00   | 32.00  |

Table S2 Antibody list: Antibodies used for immunohistochemistry.

| Peptide/protein target               | Manufacturer                  | Species raised in; monoclonal or polyclonal |
|--------------------------------------|-------------------------------|---------------------------------------------|
| Leptin                               | Abcam (ab16227)               | Rabbit polyclonal                           |
| p-ObR (Tyr 1138)                     | Santa Cruz Biotech (sc-16421) | Rabbit polyclonal                           |
| Muc2                                 | Santa Cruz Biotech (sc-15334) | Rabbit polyclonal                           |
| Lgr5                                 | Abcam (ab75732)               | Rabbit polyclonal                           |
| H <sup>+</sup> K <sup>+</sup> ATPase | Abcam (ab 2866)               | Mouse monoclonal                            |
| p-STAT3 (Tyr705)                     | Cell Signaling (9145S)        | Rabbit polyclonal                           |
| STAT3                                | Santa Cruz Biotech (sc-8019)  | Mouse monoclonal                            |
| p-p44/p42 MAPK (ERK1/2)              | Cell Signaling (9106S)        | Mouse monoclonal                            |
| MAPK (ERK2)                          | Santa Cruz (sc-1647)          | Mouse monoclonal                            |
| p-PI3K p85/p55                       | Cell Signaling (#4228)        | Rabbit polyclonal                           |
| PI3 Kinase p85                       | Cell Signaling (#4257)        | Rabbit polyclonal                           |
| p-Akt (Ser 473)                      | Cell Signaling (#4060)        | Rabbit polyclonal                           |
| Akt                                  | Cell Signaling (#4691)        | Rabbit polyclonal                           |
| β-catenin                            | Abcam (ab227499)              | Rabbit polyclonal                           |
| Ki67                                 | Abcam (ab15580)               | Rabbit polyclonal                           |

Table S3 Primers used for qPCR.

| Name         |            | Primer sequences                  | Accession Number |
|--------------|------------|-----------------------------------|------------------|
| <i>Lept</i>  | sense      | 5'-TGA CAC CAA AAC CCT CAT CA-3'  | NM_008493.3      |
|              | anti-sense | 5'-TCA TTG GCT ATC TGC AGC AC-3'  |                  |
| <i>Il-11</i> | sense      | 5'- CTC TTC AGA CCC TCG AGC AG-3' | NM_008350.4      |
|              | anti-sense | 5'- AAG CTG CAA AGA TCC CAA TG-3' |                  |
| <i>Tnf-a</i> | sense      | 5'-CGT CAG CCG ATT TGC TAT CT-3'  | NM_001278601.1   |
|              | anti-sense | 5'-CGG ACT CCG CAA AGT CTA AG-3'  |                  |
| <i>18S</i>   | sense      | 5'-GTA ACC CGT TGA ACC CCA TT-3'  | NM_003278.3      |
|              | anti-sense | 5'-CCA TCC AAT CGG TAG TAG CG -3' |                  |
